# Supplementary material for: LPMO AfAA9_B and Cellobiohydrolase AfCel6A from A. fumigatus Boost Enzymatic Saccharification Activity of Cellulase Cocktail
Source: MDPI journal article supplement (doi:10.3390/ijms22010276), 2020-12-29
Supplement: s1 [file s1]

**Supplementary Table S1:** Secondary structure proportions of *AfAA9\_B* and *AfCel6A* from literature and different prediction methods in comparison with the one determined by BeStSel based on the CD spectra.

|                                      | <i>AfAA9_B</i>       |              |        |                       | <i>AfCel6A</i>  |        |                       |
|--------------------------------------|----------------------|--------------|--------|-----------------------|-----------------|--------|-----------------------|
|                                      | BeStSel<br>1<br>(CD) | PDB:<br>5X6A | Phyre2 | Kabsch<br>&<br>Sander | BeStSel<br>(CD) | Phyre2 | Kabsch<br>&<br>Sander |
| <b><math>\alpha</math>-helix (%)</b> | 8.3                  | 12.7         | 1.0    | 10.9                  | 27.0            | 28.0   | 30.3                  |
| <b><math>\beta</math>-strand (%)</b> | 31.4                 | 31.4         | 40.0   | 29.3                  | 7.7             | 10.0   | 10.8                  |
| <b>Turns (%)</b>                     | 11.9                 | -            | -      | -                     | 12.8            | -      | -                     |
| <b>Others (%)</b>                    | 48.4                 | 55.9         | 59.0   | 59.8                  | 52.8            | 62.0   | 58.9                  |
